# Supplementary material for: Psychological Toll of the COVID-19 Pandemic: An In-Depth Exploration of Anxiety, Depression, and Insomnia and the Influence of Quarantine Measures on Daily Life
Source: MDPI journal article supplement (doi:10.3390/healthcare11172418), 2023-08-29
Supplement: s1 [file s1]

**Table S1.** Socio-demographic characteristics of participants (N=999).

| <b>Variable</b>             | <b>n (Percentage)</b> |
|-----------------------------|-----------------------|
| <b>Gender</b>               |                       |
| Female                      | 554 (55.5%)           |
| Male                        | 445 (44.5%)           |
| <b>Age</b>                  |                       |
| 18-25                       | 242 (24.2%)           |
| 26-35                       | 403 (40.3%)           |
| 36-45                       | 254 (25.4%)           |
| 46-75                       | 100 (10%)             |
| <b>Education level</b>      |                       |
| High school equivalent      | 31 (3.1%)             |
| Bachelor                    | 285 (28.5%)           |
| Diploma                     | 79 (7.9%)             |
| Master                      | 367 (36.7%)           |
| PhD                         | 237 (23.7%)           |
| <b>Country of origin</b>    |                       |
| Malaysia                    | 282 (28.2%)           |
| Yemen                       | 111 (11.1%)           |
| Indonesia                   | 73 (7.3%)             |
| Nigeria                     | 62 (6.2%)             |
| Sri Lanka                   | 65 (6.5%)             |
| Tunisia                     | 43 (4.3%)             |
| Pakistan                    | 27 (2.7%)             |
| Somalia                     | 24 (2.4%)             |
| Syria                       | 22 (2.2%)             |
| Saudi Arabia                | 22 (2.2%)             |
| Vietnam                     | 23 (2.3%)             |
| Bangladesh                  | 29 (2.9%)             |
| China                       | 23 (2.3%)             |
| India                       | 20 (2.0%)             |
| Iraq                        | 34 (3.4%)             |
| Egypt                       | 22 (2.2%)             |
| Algeria                     | 24 (2.4%)             |
| Guinea                      | 21 (2.1%)             |
| Afghanistan                 | 25 (2.5%)             |
| Others                      | 47 (4.7%)             |
| <b>Marital Status</b>       |                       |
| Married                     | 496 (49.6%)           |
| Single                      | 464 (46.4%)           |
| Engaged                     | 27 (2.7%)             |
| Divorced                    | 12 (1.2%)             |
| <b>Employment Status</b>    |                       |
| Students                    | 551 (55.2%)           |
| Educational profession      | 230 (23%)             |
| Administrative professional | 56 (5.6%)             |
| Healthcare workers          | 53 (5.3%)             |
| Others                      | 109 (10.9%)           |
